# Supplementary material
Source: PubMed Central journal article supplement (PMC3543502)

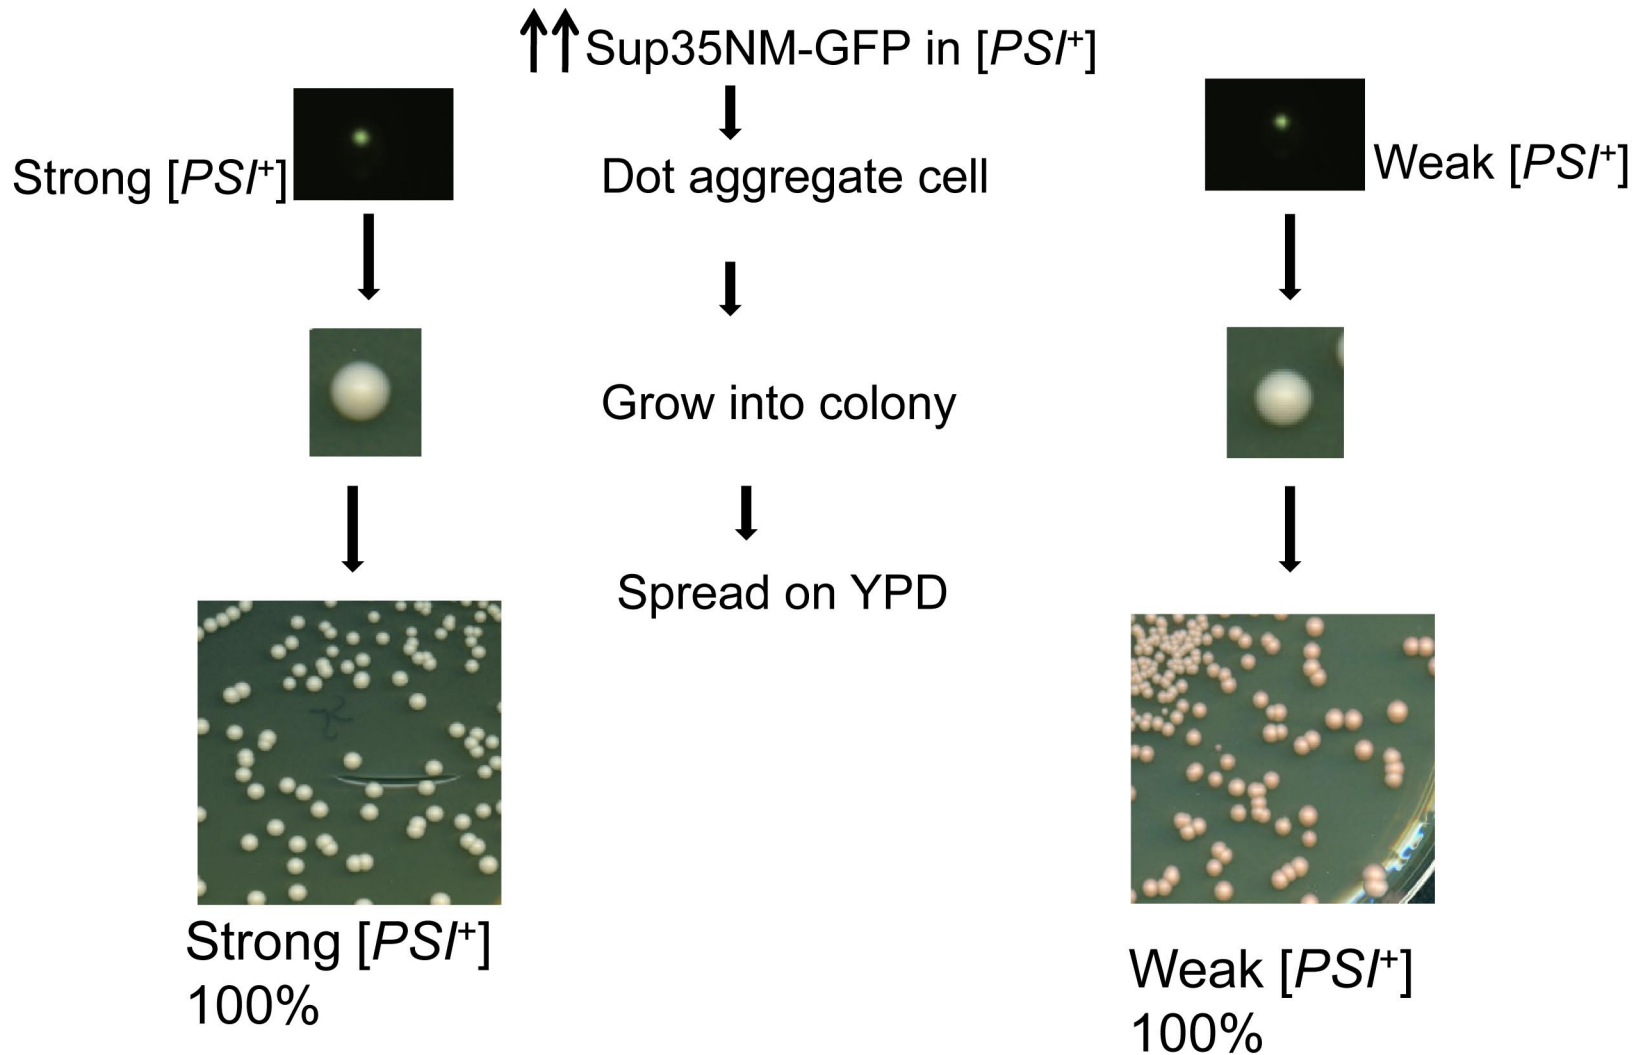

Supplement: NIHMS405343-supplement-Supp_Figure_S1.pdf [file NIHMS405343-supplement-Supp_Figure_S1.pdf]
